# Supplementary material for: A comparative analysis of heart microRNAs in vertebrates brings novel insights into the evolution of genetic regulatory networks
Source: PubMed Central journal article supplement (PMC7931589; doi:10.1186/s12864-021-07441-4), 2021-03-04
Supplement: 12864_2021_7441_MOESM5_ESM.pdf [file 12864_2021_7441_MOESM5_ESM.pdf]

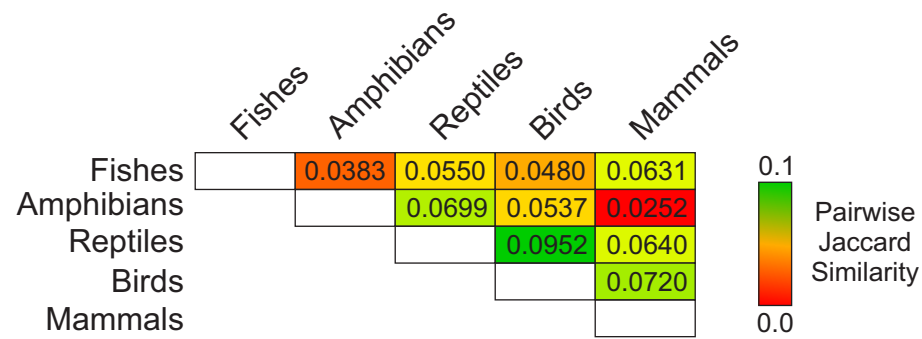

**Supplementary figure S1.** Pairwise Jaccard Similarity of miR-target interactions detected in each group of vertebrates.

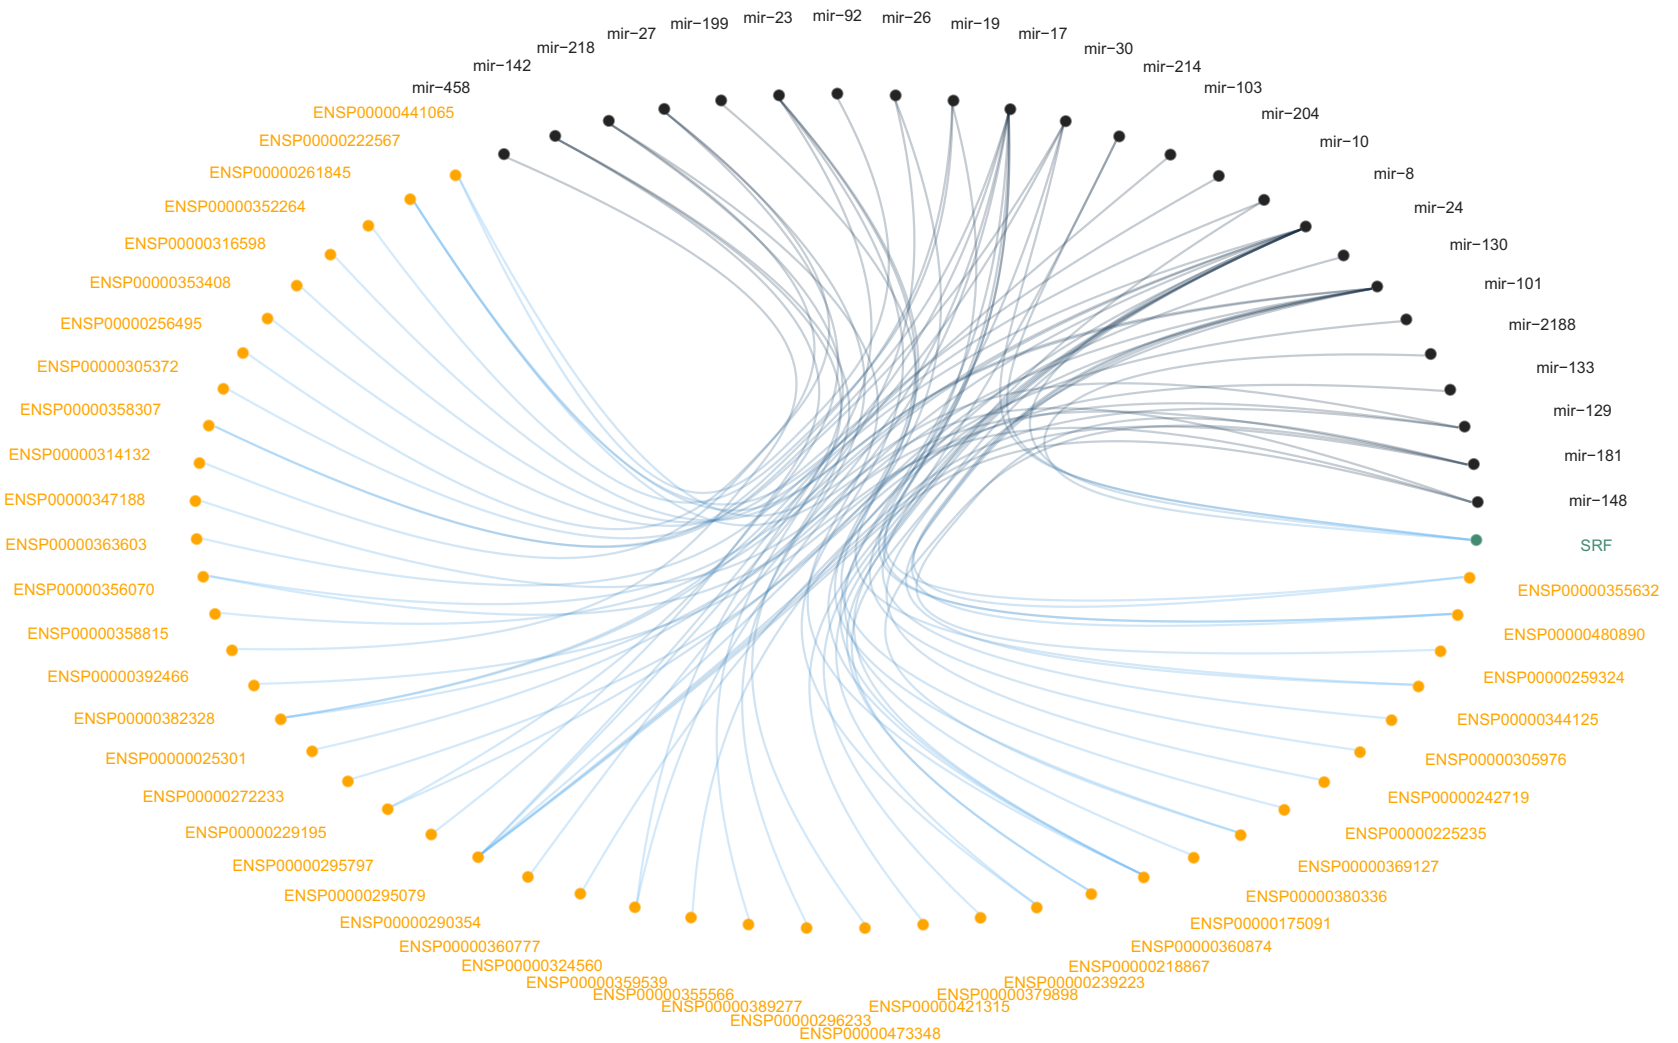

# Fishes X Amphibians

Number of conserved interactions: 72

**Supplementary figure S2.** Pairwise alignment of miR-target interactions detected in heart of fishes and amphibians.

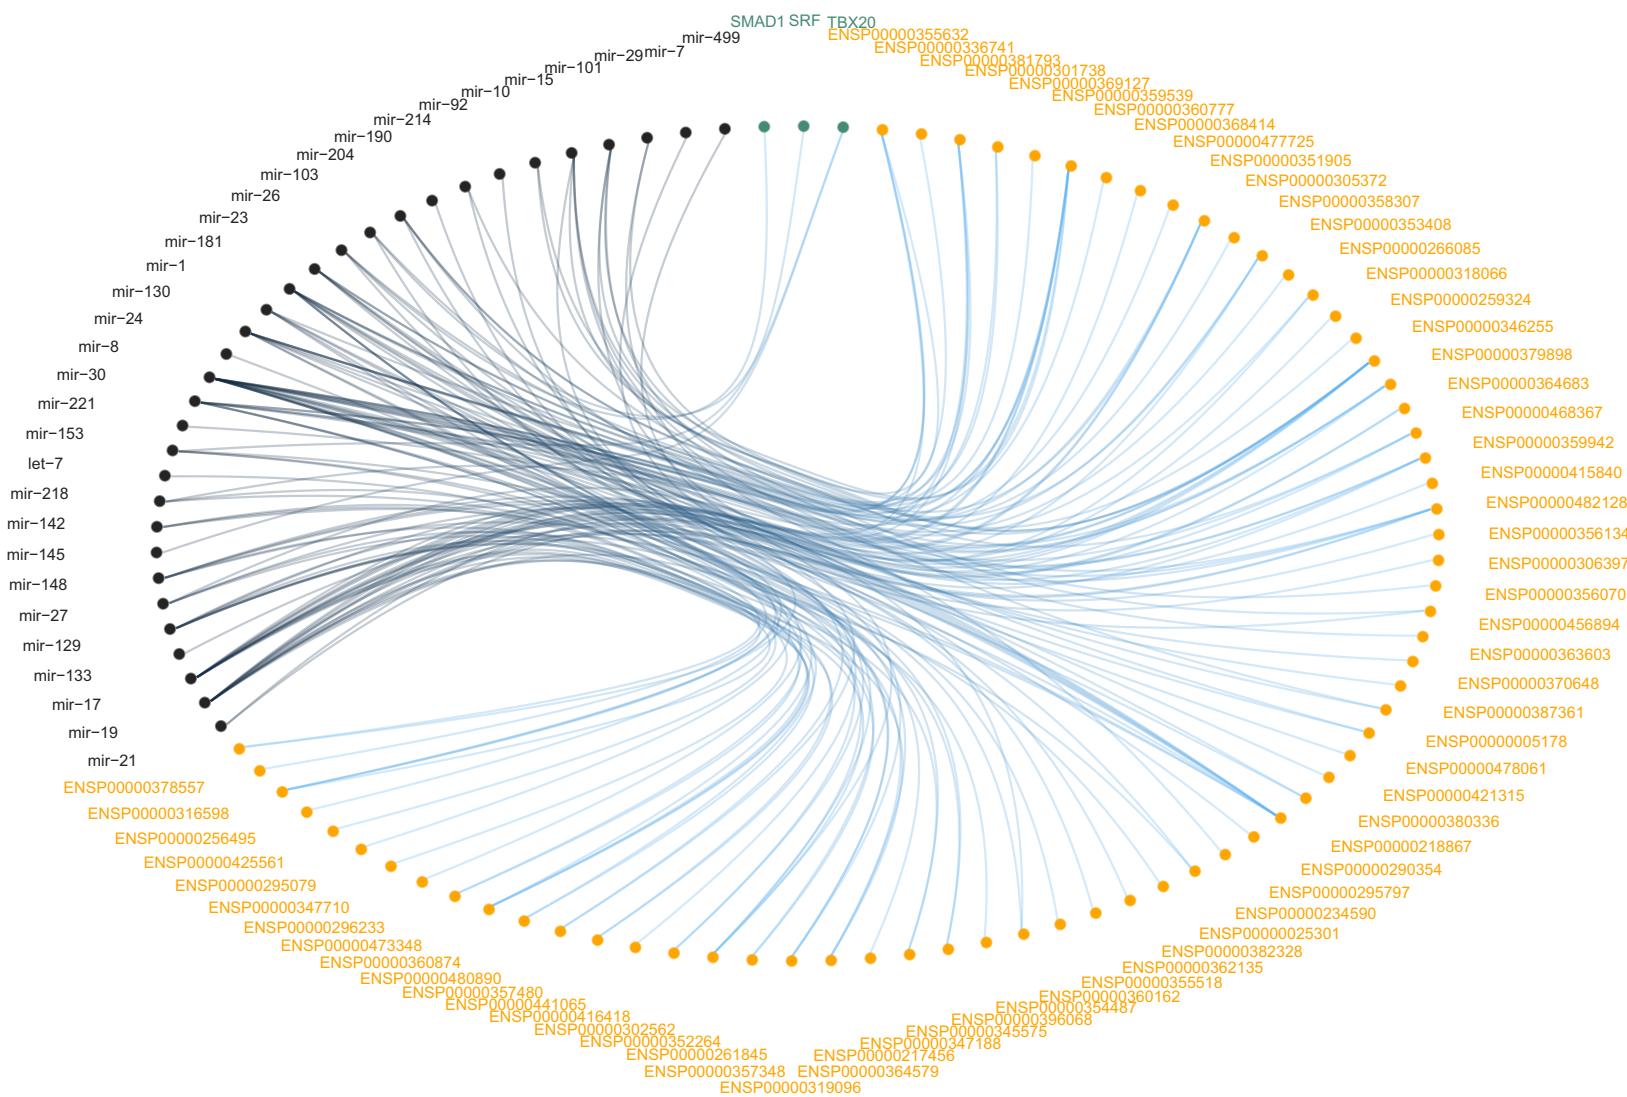

# Fishes X Reptiles

Number of conserved interactions: 145

**Supplementary figure S3.** Pairwise alignment of miR-target interactions detected in heart of fishes and reptiles.

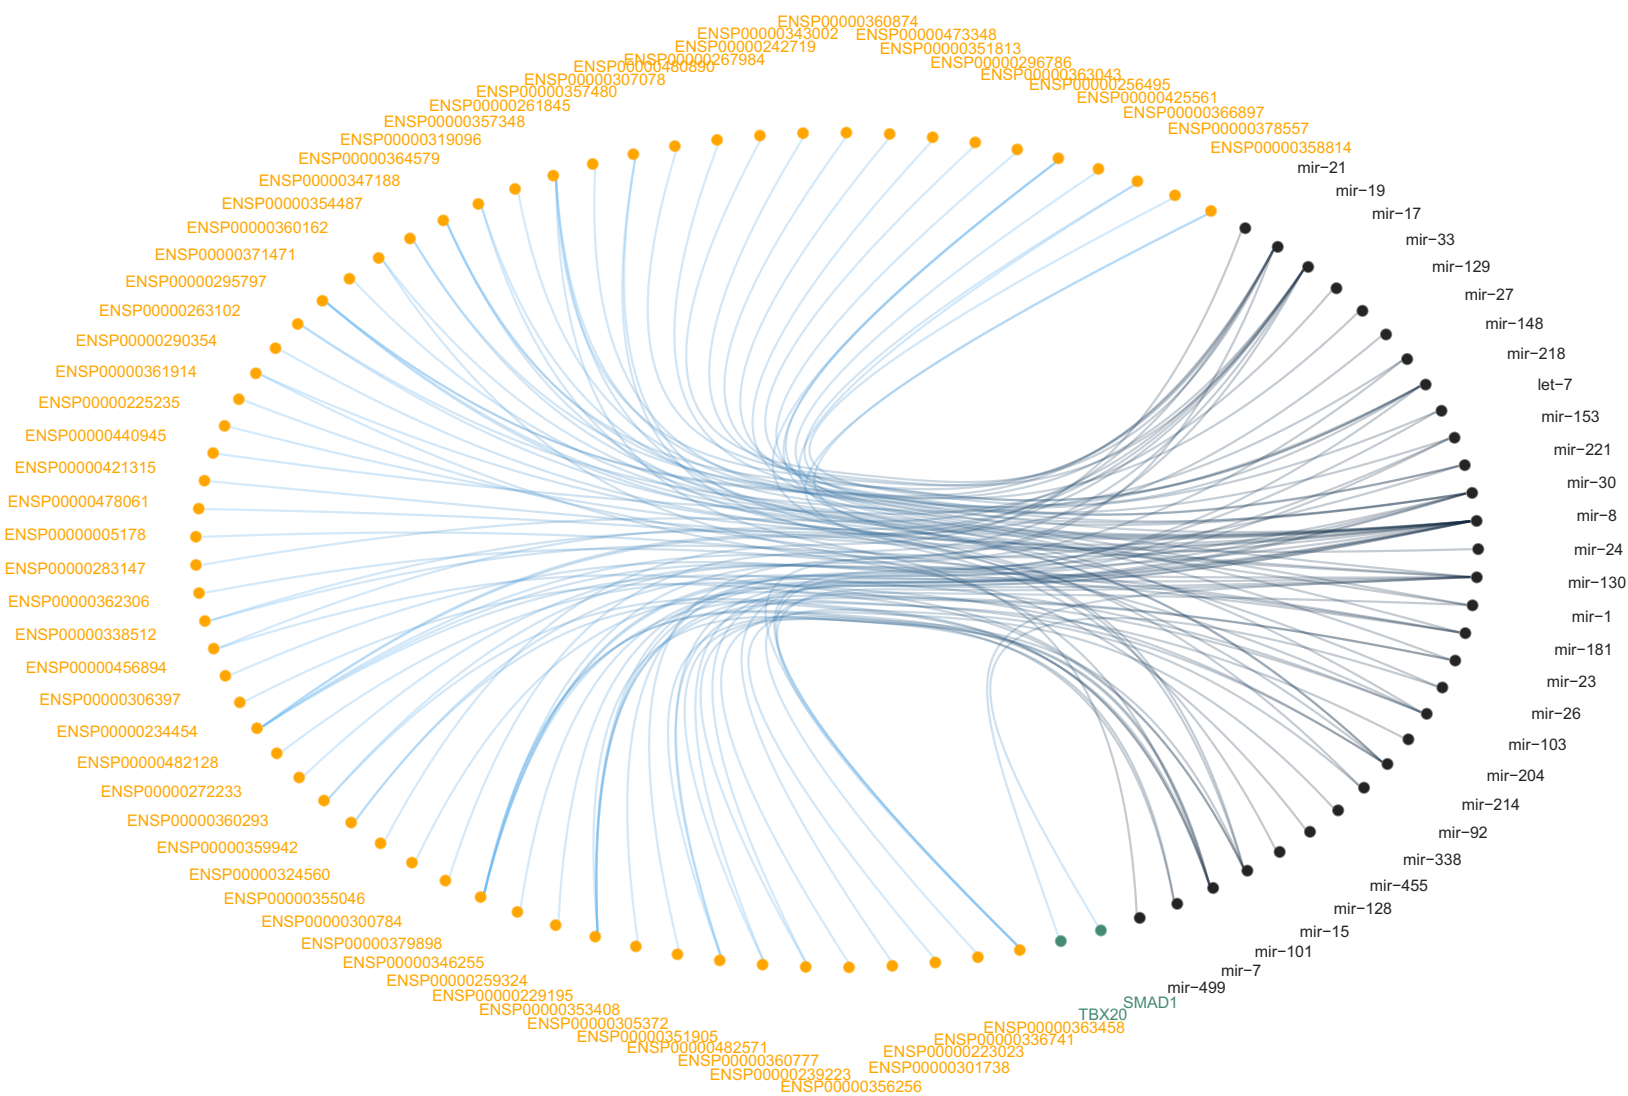

# Fishes X Birds

Number of conserved interactions: 105

**Supplementary figure S4.** Pairwise alignment of miR-target interactions detected in heart of fishes and birds.

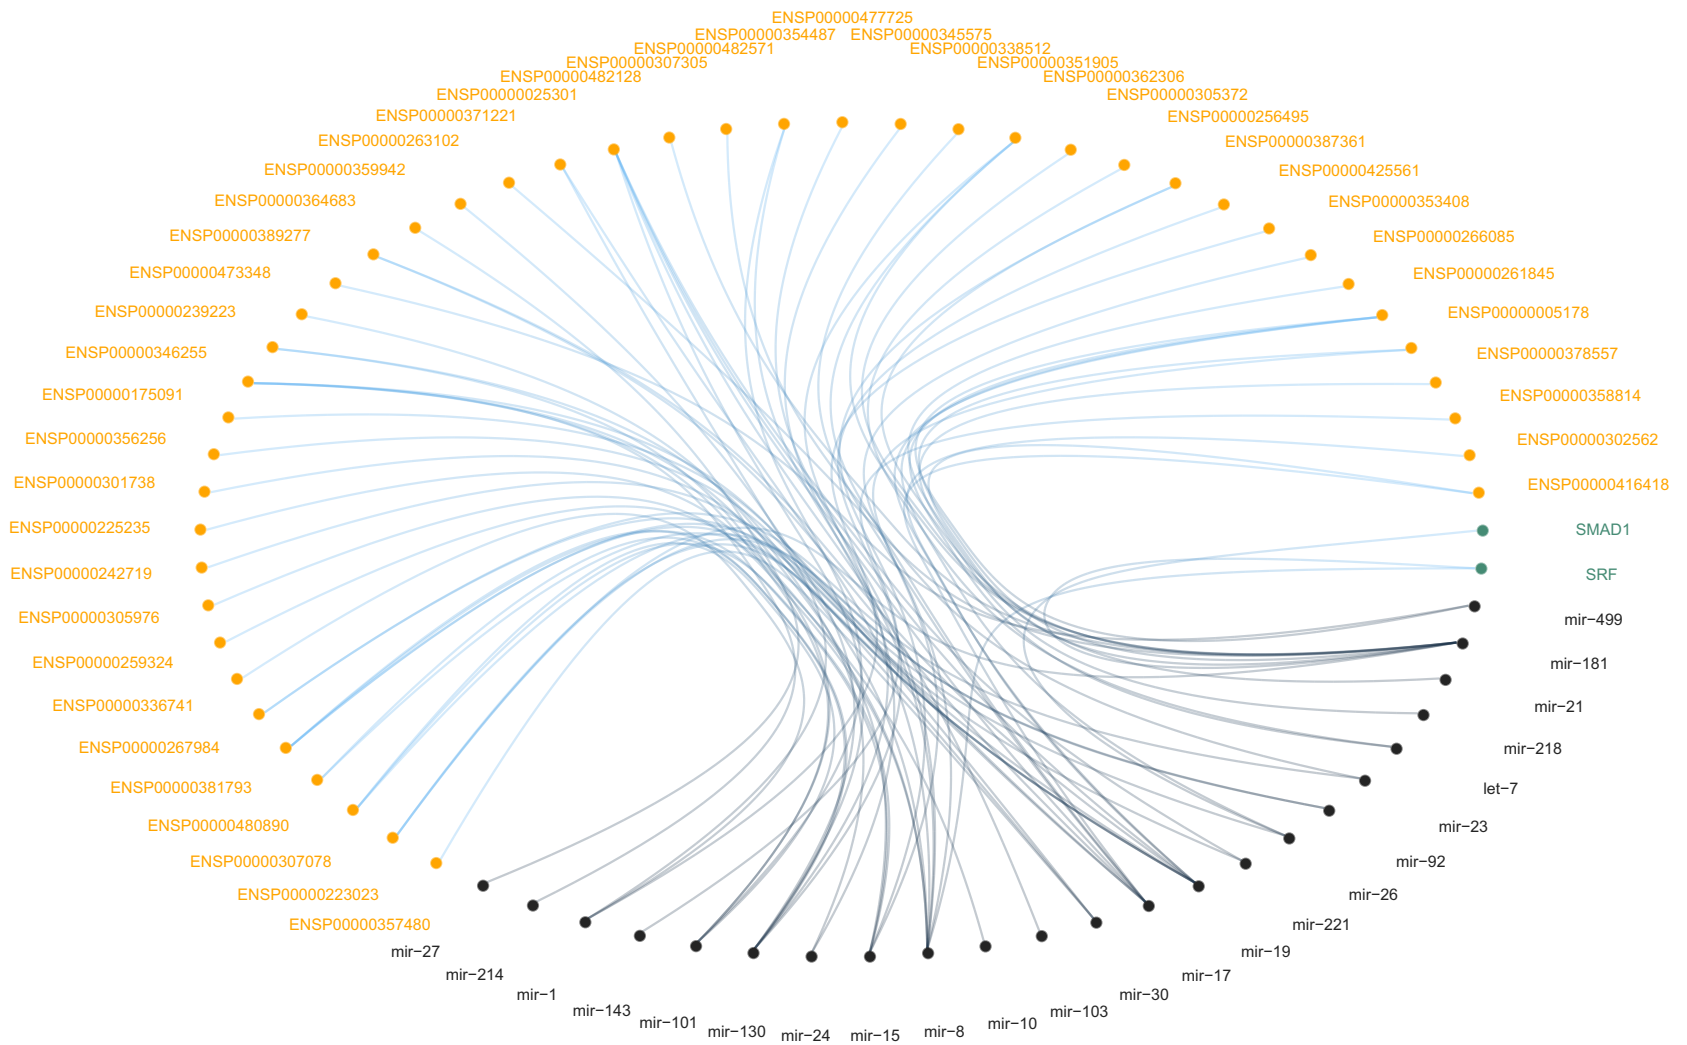

# Fishes X Mammals

Number of conserved interactions: 75

**Supplementary figure S5.** Pairwise alignment of miR-target interactions detected in heart of fishes and mammals.

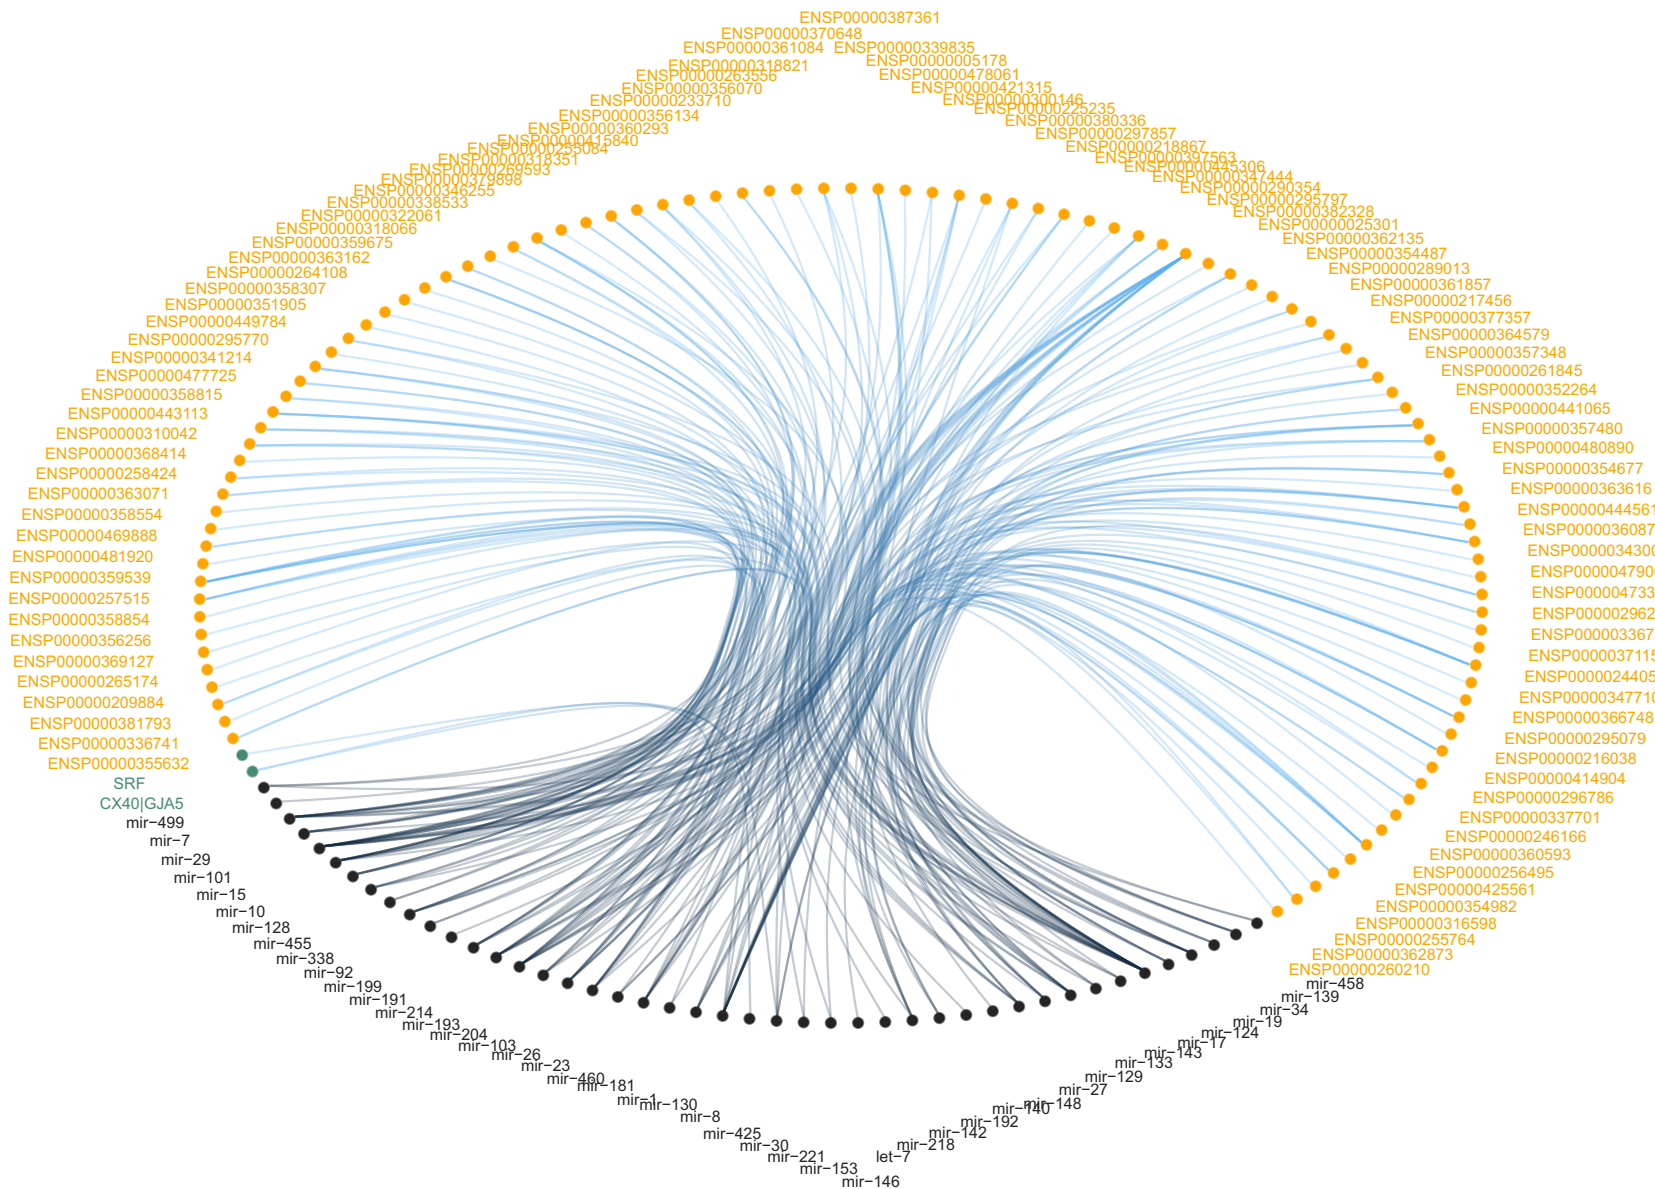

# Amphibians X Reptiles

Number of conserved interactions: 232

**Supplementary figure S6.** Pairwise alignment of miR-target interactions detected in heart of amphibians and reptiles.

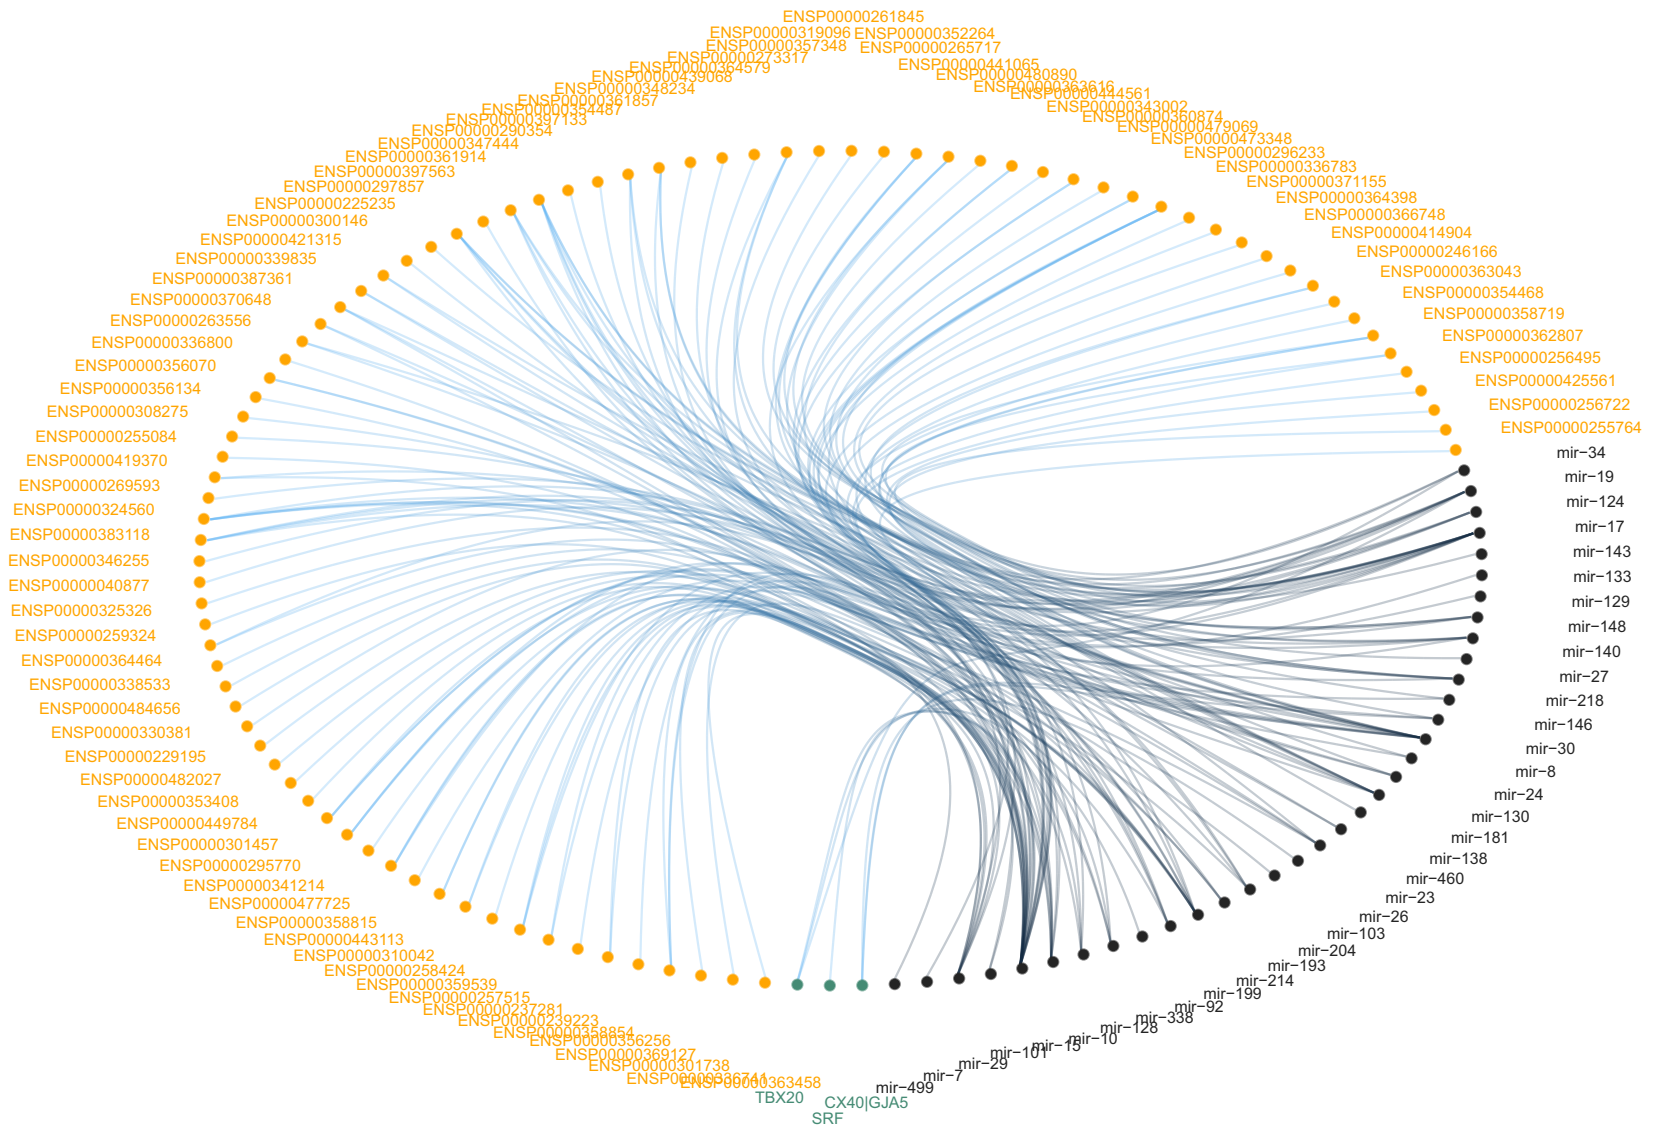

# Amphibians X Birds

Number of conserved interactions: 156

**Supplementary figure S7.** Pairwise alignment of miR-target interactions detected in heart of amphibians and birds.

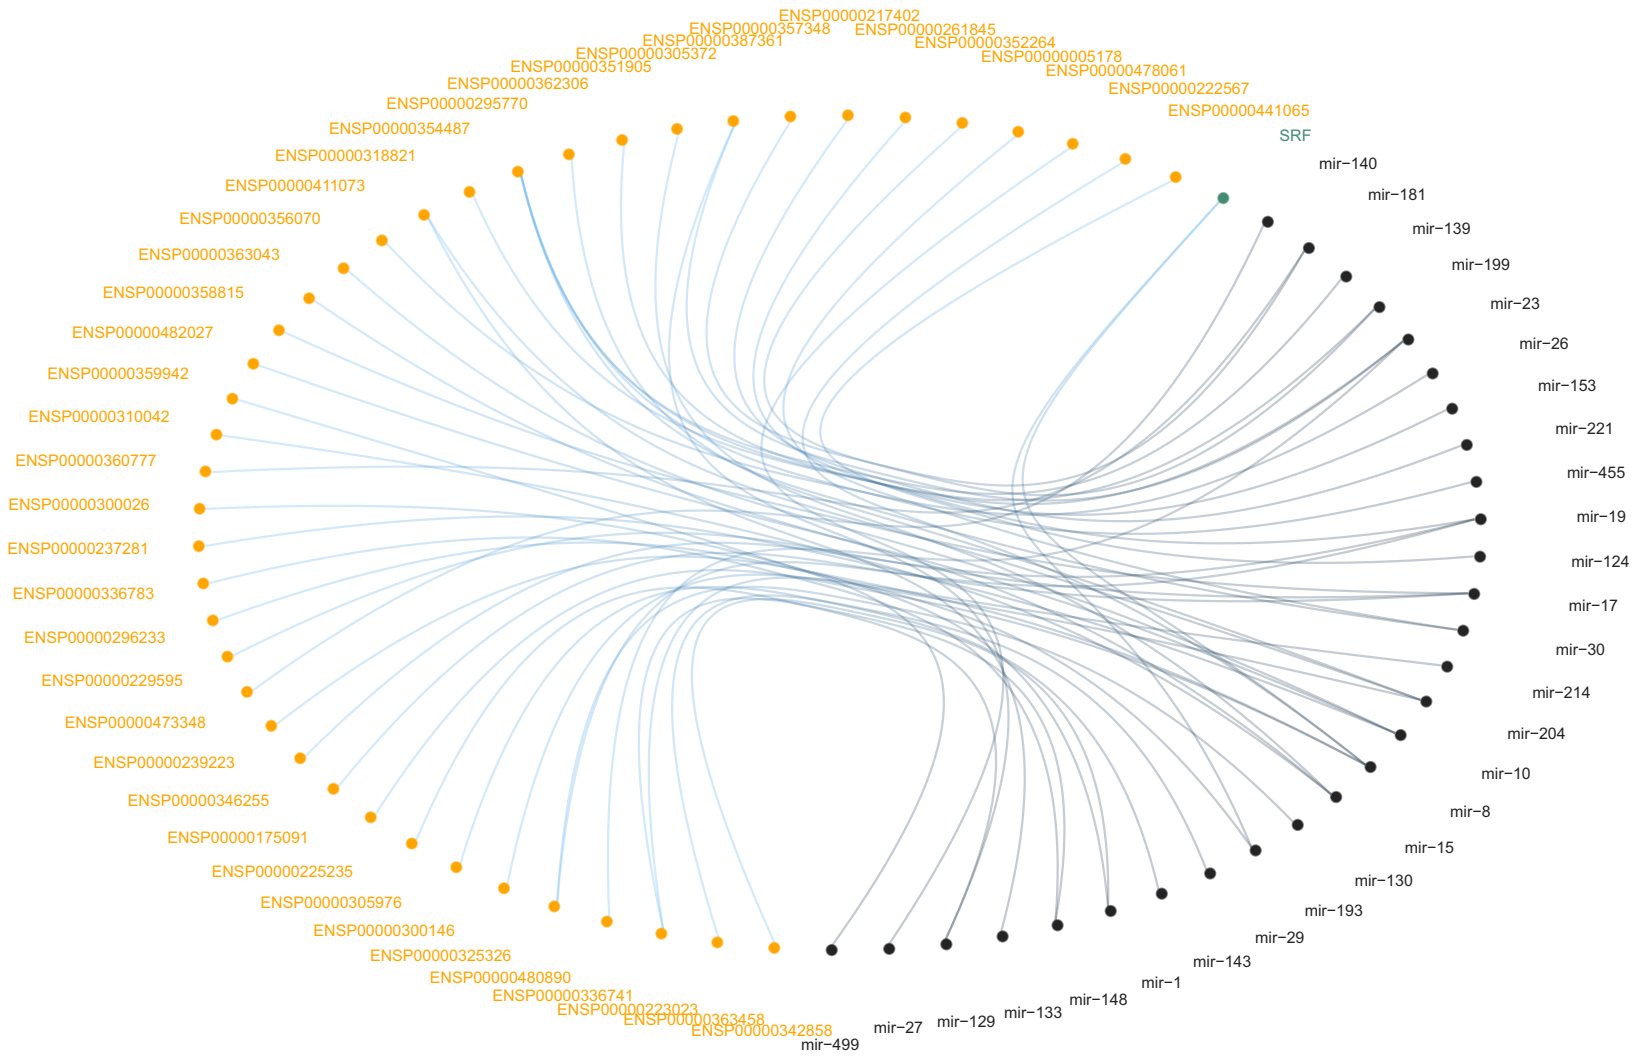

# Amphibians X Mammals

Number of conserved interactions: 50

**Supplementary figure S8.** Pairwise alignment of miR-target interactions detected in heart of amphibians and mammals.



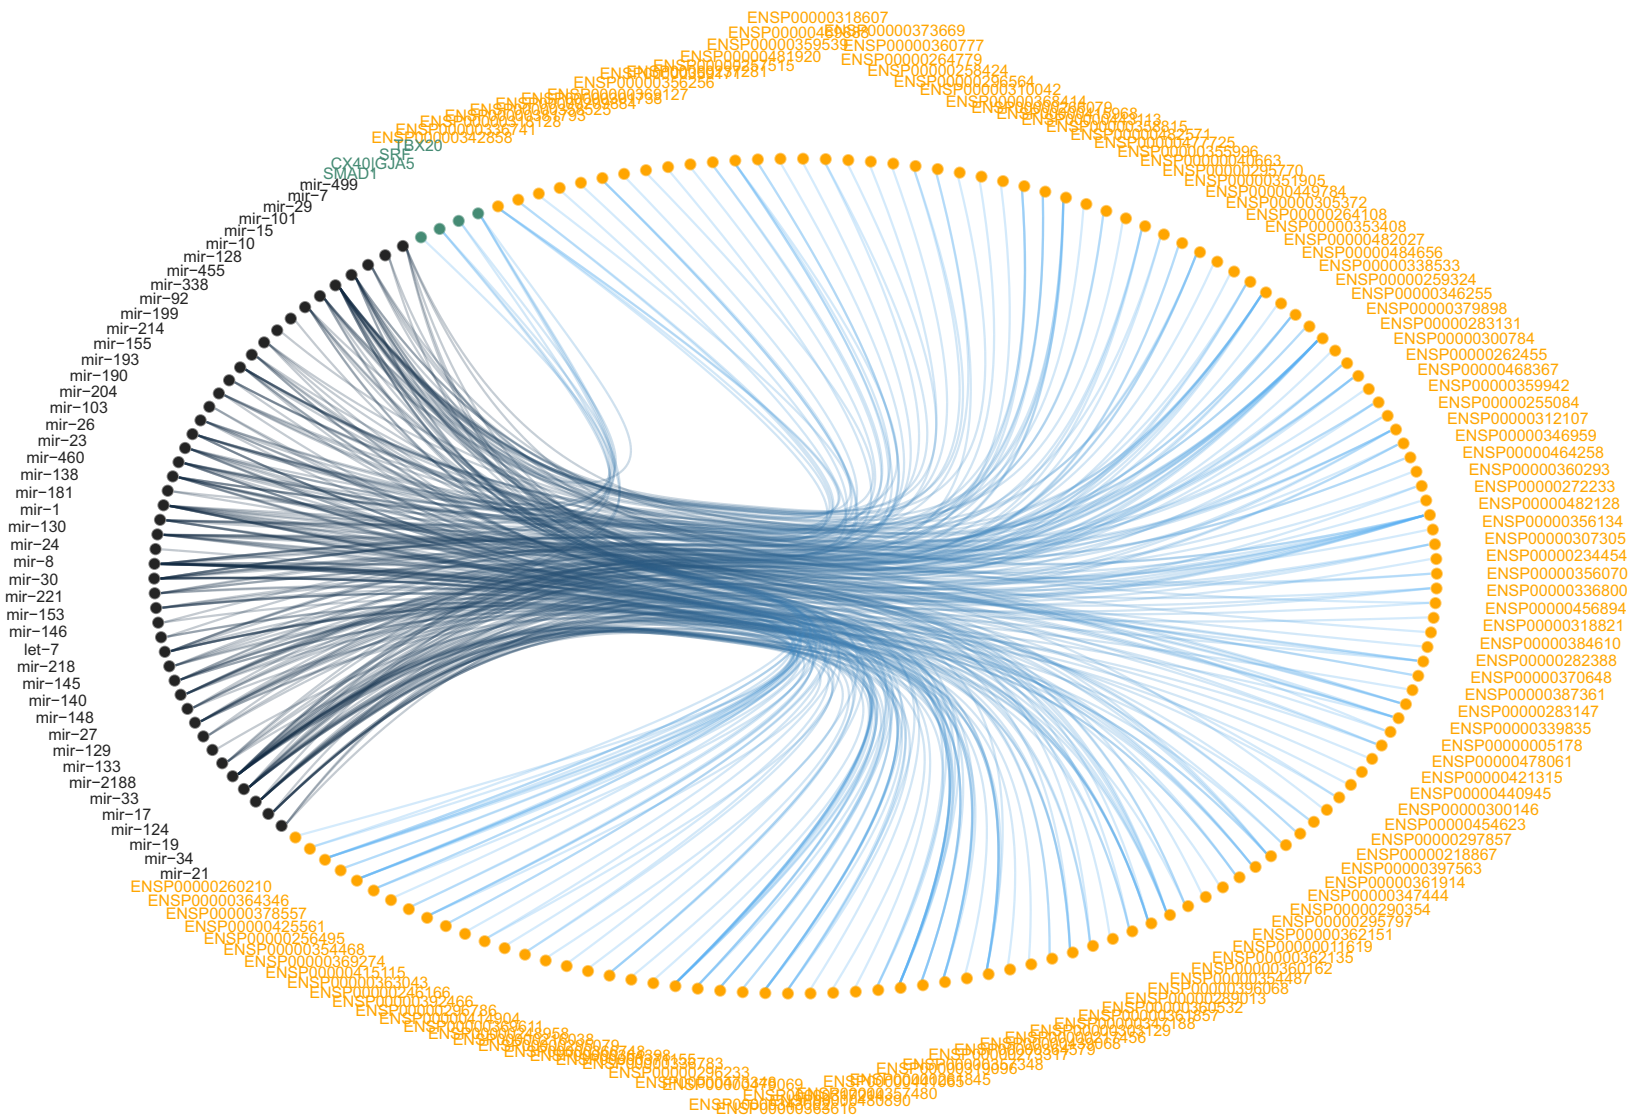

# Reptiles X Birds

Number of conserved interactions: 338

**Supplementary figure S9.** Pairwise alignment of miR-target interactions detected in heart of reptiles and birds.

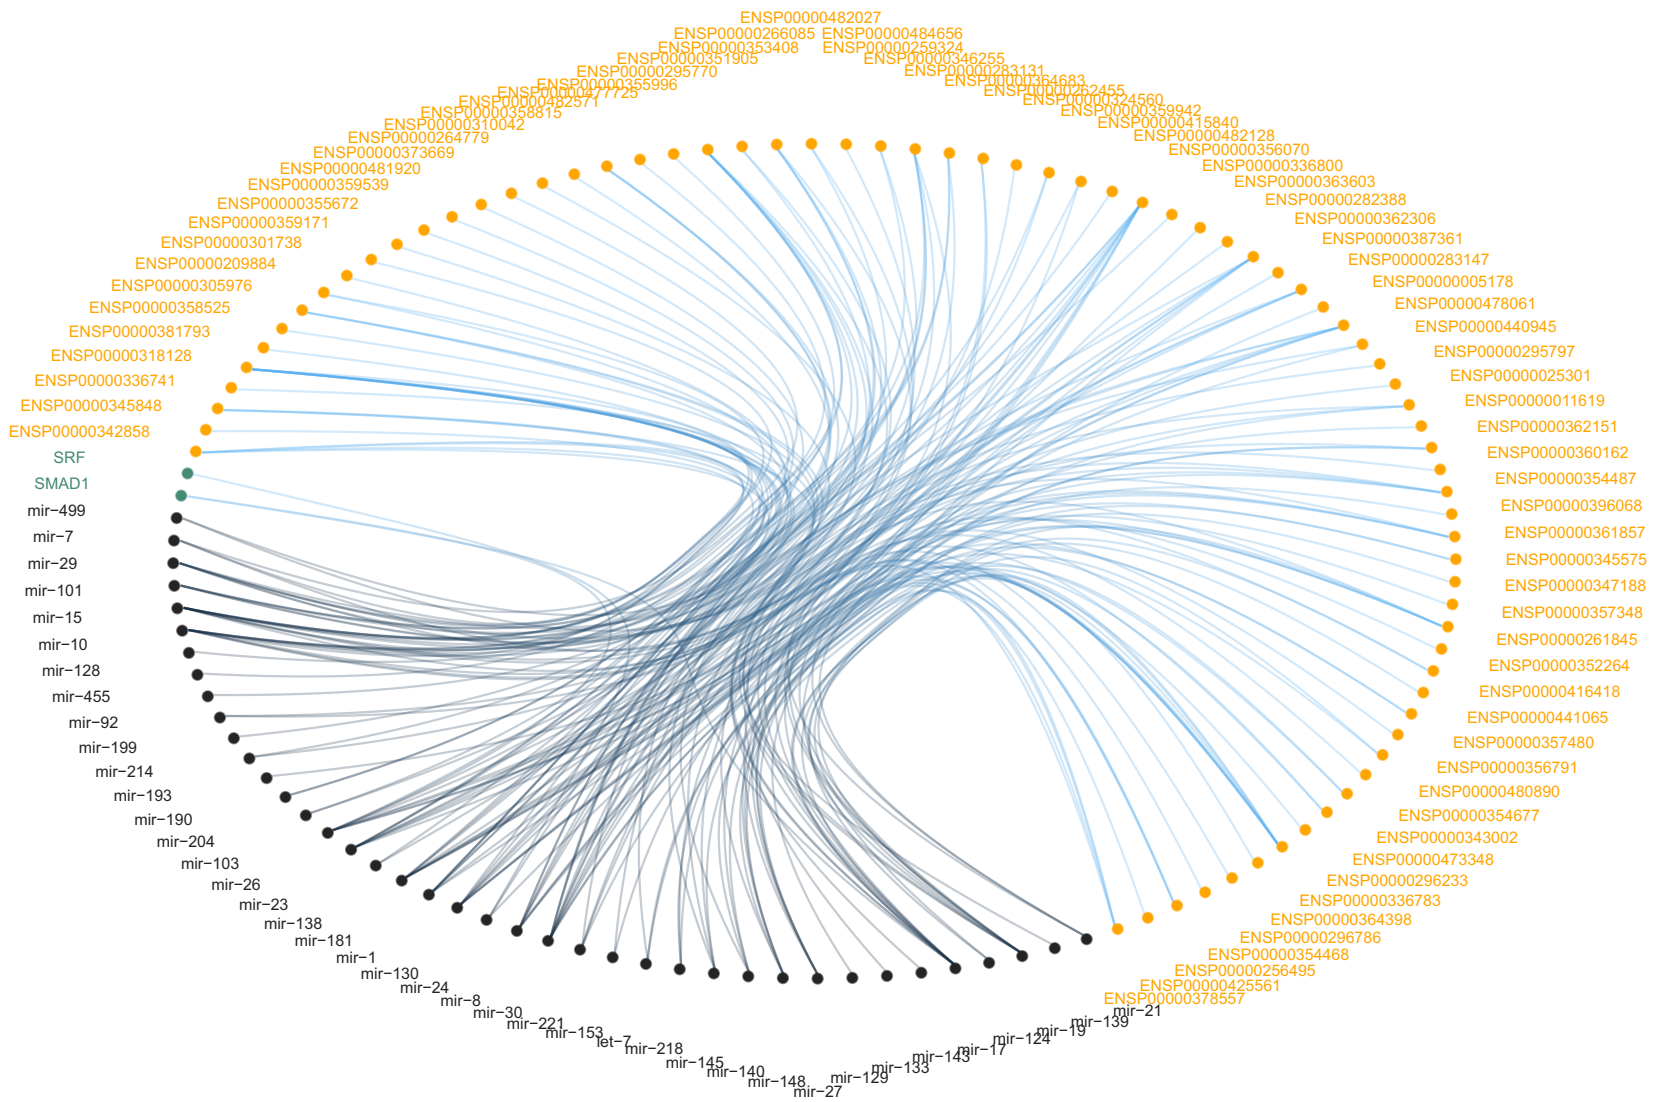

# Reptiles X Mammals

Number of conserved interactions: 172

**Supplementary figure S10.** Pairwise alignment of miR-target interactions detected in heart of reptiles and mammals.

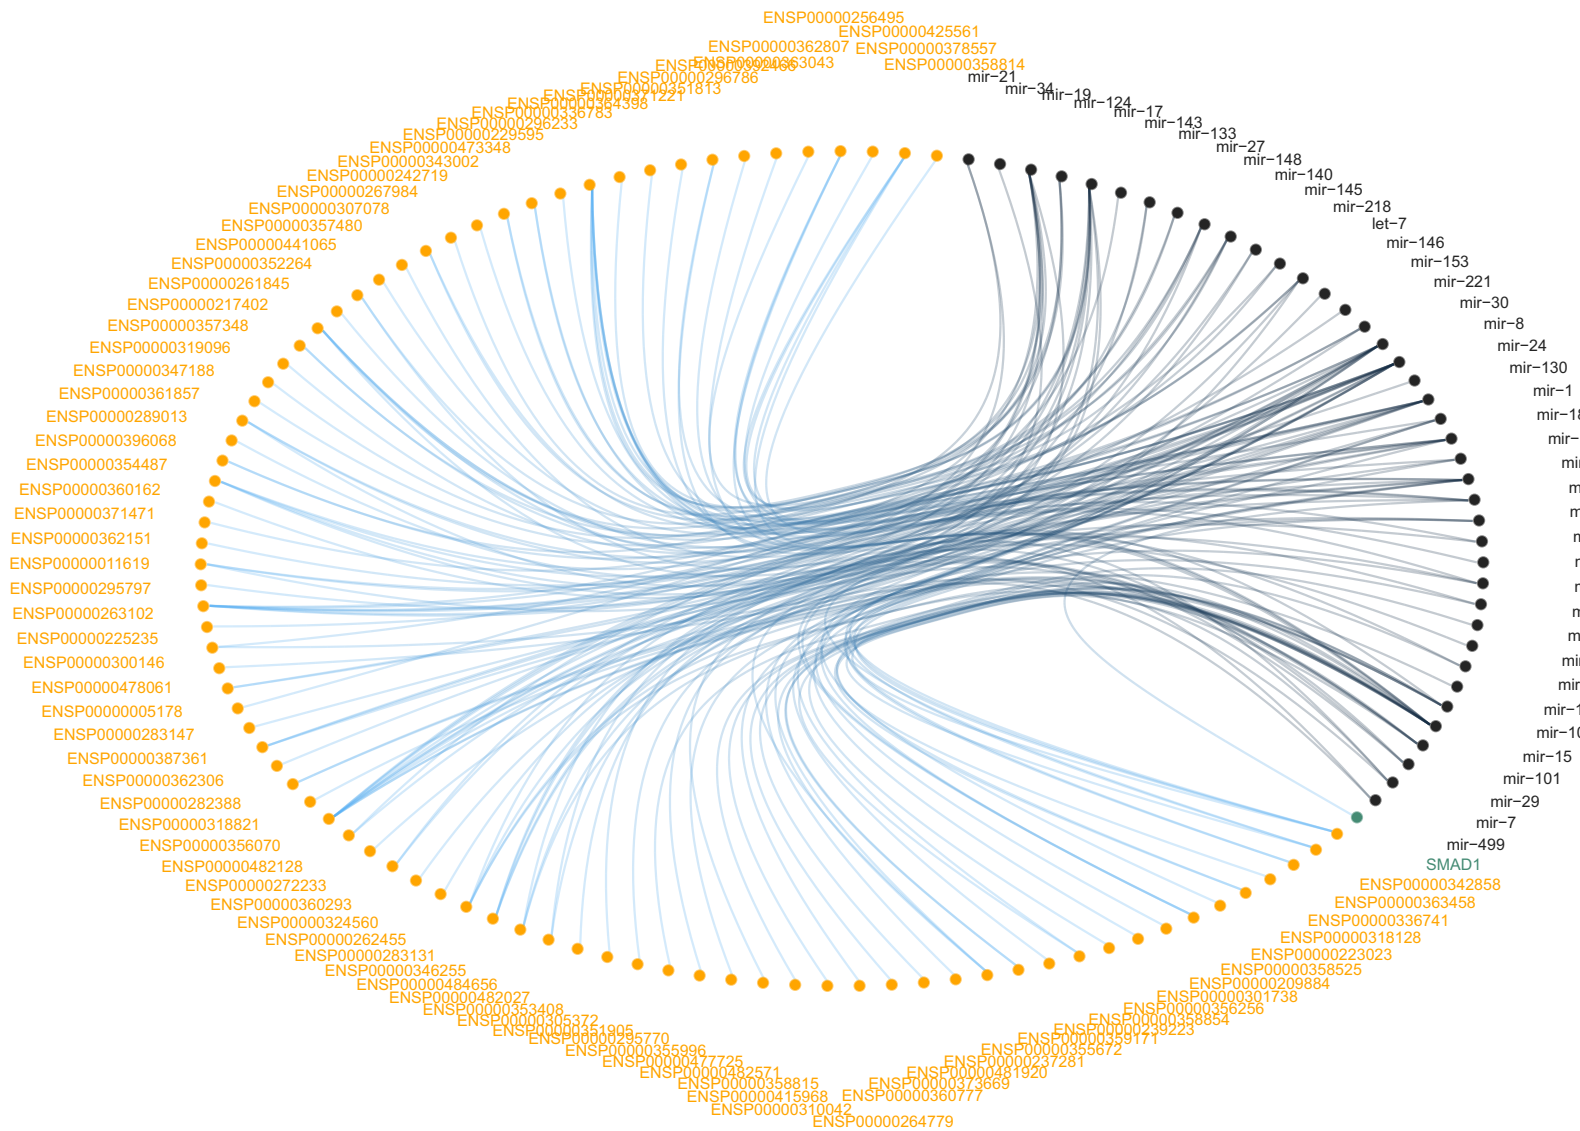

# Birds X Mammals

Number of conserved interactions: 159

**Supplementary figure S11.** Pairwise alignment of miR-target interactions detected in heart of birds and mammals.
