# Supplementary material for: A comparative analysis of heart microRNAs in vertebrates brings novel insights into the evolution of genetic regulatory networks
Source: PubMed Central journal article supplement (PMC7931589; doi:10.1186/s12864-021-07441-4), 2021-03-04
Supplement: 12864_2021_7441_MOESM7_ESM.pdf [file 12864_2021_7441_MOESM7_ESM.pdf]

# Heart Datasets

20 vertebrate species  
├─ 17 from previous studies  
└─ 3 from present study

## Filtering step

- Cut adaptors
- Remove low-quality reads
- Size filtering

## Mapping

- Bowtie

## miRNA annotation

- miRDeep2
- ShortStack

miRBase  
+  
MirGeneDB

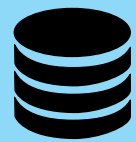

## Family characterization

## Comparisons

### Qualitative

- Intersections
- Abundance
- miRNAs age

## Target prediction

TargetScan + miRanda

## Target filtering

Keep genes  
expressed in  
Heart transcriptome

## Heart GRN analysis

- STRING
- MiRTarBase
- Centrality analysis
- Community detection
